# Supplementary material for: Metabolic dependency of chorismate in Plasmodium falciparum
Source: bioRxiv or medRxiv preprint supplement (doi:10.1101/698951), 2019-07-13
Supplement: Supplementary file [file media-1.pdf]

## Supplemental Material

### Metabolic dependency of chorismate in *Plasmodium falciparum*

Ana Lisa Valenciano,<sup>1</sup> Maria L. Fernández-Murga,<sup>2</sup> Emilio F. Merino,<sup>1</sup> Nicole R. Holderman,<sup>1</sup> Grant J. Butschek,<sup>1</sup> Karl J. Shaffer,<sup>3</sup> Peter C. Tyler,<sup>3</sup> and Maria Belen Cassera<sup>1\*</sup>

From the <sup>1</sup>Department of Biochemistry & Molecular Biology, and Center for Tropical and Emerging Global Diseases (CTEGD), University of Georgia, Athens, Georgia 30602, United States; <sup>2</sup>Laboratory of Experimental Pathology, Health Research Institute Hospital La Fe, Valencia 46026, Spain; <sup>3</sup>The Ferrier Research Institute, Victoria University of Wellington, Lower Hutt, New Zealand

Running title: *Chorismate dependency in P. falciparum*

\* To whom correspondence should be addressed: Maria Belen Cassera: Department of Biochemistry & Molecular Biology, University of Georgia, Athens GA 30602; [maria.cassera@uga.edu](mailto:maria.cassera@uga.edu); Tel. (706) 542-5192.

**Table S1.** RPMI minimal and complete composition used in this study.

| <b>Nutrient</b>                                      | <b>Final Concentration<br/>(<math>\mu</math>M or as indicated)</b> | <b>Minimal Medium (MM)</b> | <b>Complete RPMI<br/>Medium (CM)</b> |
|------------------------------------------------------|--------------------------------------------------------------------|----------------------------|--------------------------------------|
| L-Arginine                                           | 200                                                                | +                          | +                                    |
| L-Asparagine                                         | 200                                                                | +                          | +                                    |
| L-Aspartic acid                                      | 150                                                                | +                          | +                                    |
| L-Cysteine                                           | 200                                                                | +                          | +                                    |
| L-Glutamic acid                                      | 136                                                                | +                          | +                                    |
| L-Glutamine                                          | 200                                                                | +                          | +                                    |
| Glycine                                              | 133                                                                | +                          | +                                    |
| L-Histidine                                          | 97                                                                 | +                          | +                                    |
| Hydroxy-L-proline                                    | 153                                                                | +                          | +                                    |
| L-Isoleucine                                         | 100                                                                | +                          | +                                    |
| L-Leucine                                            | 381                                                                | +                          | +                                    |
| L-Lysine                                             | 200                                                                | +                          | +                                    |
| L-Methionine                                         | 101                                                                | +                          | +                                    |
| L-Proline                                            | 174                                                                | +                          | +                                    |
| L-Serine                                             | 200                                                                | +                          | +                                    |
| L-Threonine                                          | 168                                                                | +                          | +                                    |
| L-Valine                                             | 171                                                                | +                          | +                                    |
| Choline Chloride                                     | 0.0214                                                             | +                          | +                                    |
| D-Biotin                                             | 0.00082                                                            | +                          | +                                    |
| D-Calcium pantothenate                               | 0.00052                                                            | +                          | +                                    |
| <i>Myo</i> -Inositol                                 | 0.194                                                              | +                          | +                                    |
| Niacinamide                                          | 0.0081                                                             | +                          | +                                    |
| Pyridoxine hydrochloride                             | 0.0048                                                             | +                          | +                                    |
| Riboflavin                                           | 0.00052                                                            | +                          | +                                    |
| Thiamine hydrochloride                               | 0.00296                                                            | +                          | +                                    |
| Vitamin B12                                          | 0.00037                                                            | +                          | +                                    |
| Reduced Glutathione                                  | 3,254                                                              | +                          | +                                    |
| Ca(NO <sub>3</sub> ) <sub>2</sub>                    | 609                                                                | +                          | +                                    |
| HEPES                                                | 20,967                                                             | +                          | +                                    |
| KCl                                                  | 5,365                                                              | +                          | +                                    |
| MgSO <sub>4</sub>                                    | 407                                                                | +                          | +                                    |
| NaCl                                                 | 102,669                                                            | +                          | +                                    |
| Na <sub>2</sub> HPO <sub>4</sub> •7 H <sub>2</sub> O | 2,797                                                              | +                          | +                                    |
| D-Glucose                                            | 22,203                                                             | +                          | +                                    |
| NaHCO <sub>3</sub>                                   | 26,784                                                             | +                          | +                                    |
| Gentamicin                                           | 41,876                                                             | +                          | +                                    |
| Hypoxanthine                                         | 367                                                                | +                          | +                                    |
| Albumax II                                           | 5 (g/L)                                                            | +                          | +                                    |
| <b>Folic Acid</b>                                    | <b>2.2</b>                                                         |                            | +                                    |
| <b><i>p</i>-Aminobenzoate</b>                        | <b>7.3</b>                                                         |                            | +                                    |
| <b>L-Phenylalanine</b>                               | <b>90</b>                                                          |                            | +                                    |
| <b>L-Tryptophan</b>                                  | <b>24.5</b>                                                        |                            | +                                    |
| <b>L-Tyrosine</b>                                    | <b>111</b>                                                         |                            | +                                    |
| <b><i>p</i>-Hydroxybenzoate</b>                      | <b>7.3</b>                                                         |                            | +                                    |

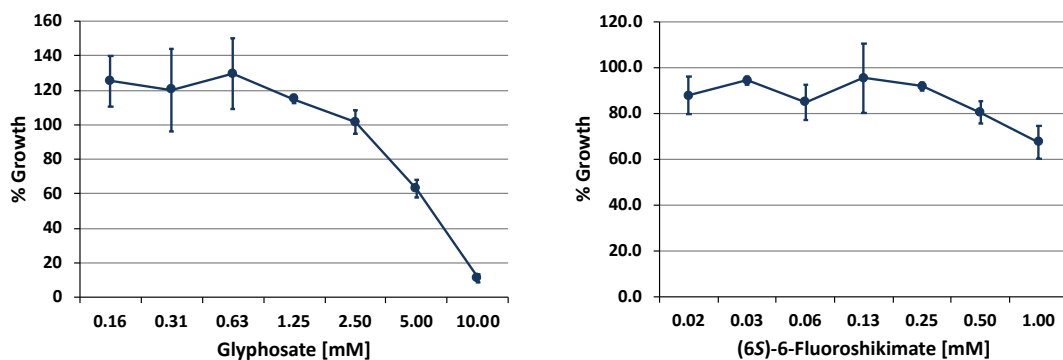

**Fig. S1. Effect of glyphosate and (6S)-6-fluoroshikimate on *in vitro* growth of *P. falciparum*.** Dose-dependent growth inhibition was determined after incubation for 72 h in the presence of increasing concentrations of the inhibitor in MM. Parasite growth was assessed by SYBR green. Results represent means  $\pm$  S.E.M. of two independent assays, with each assay performed in triplicate.

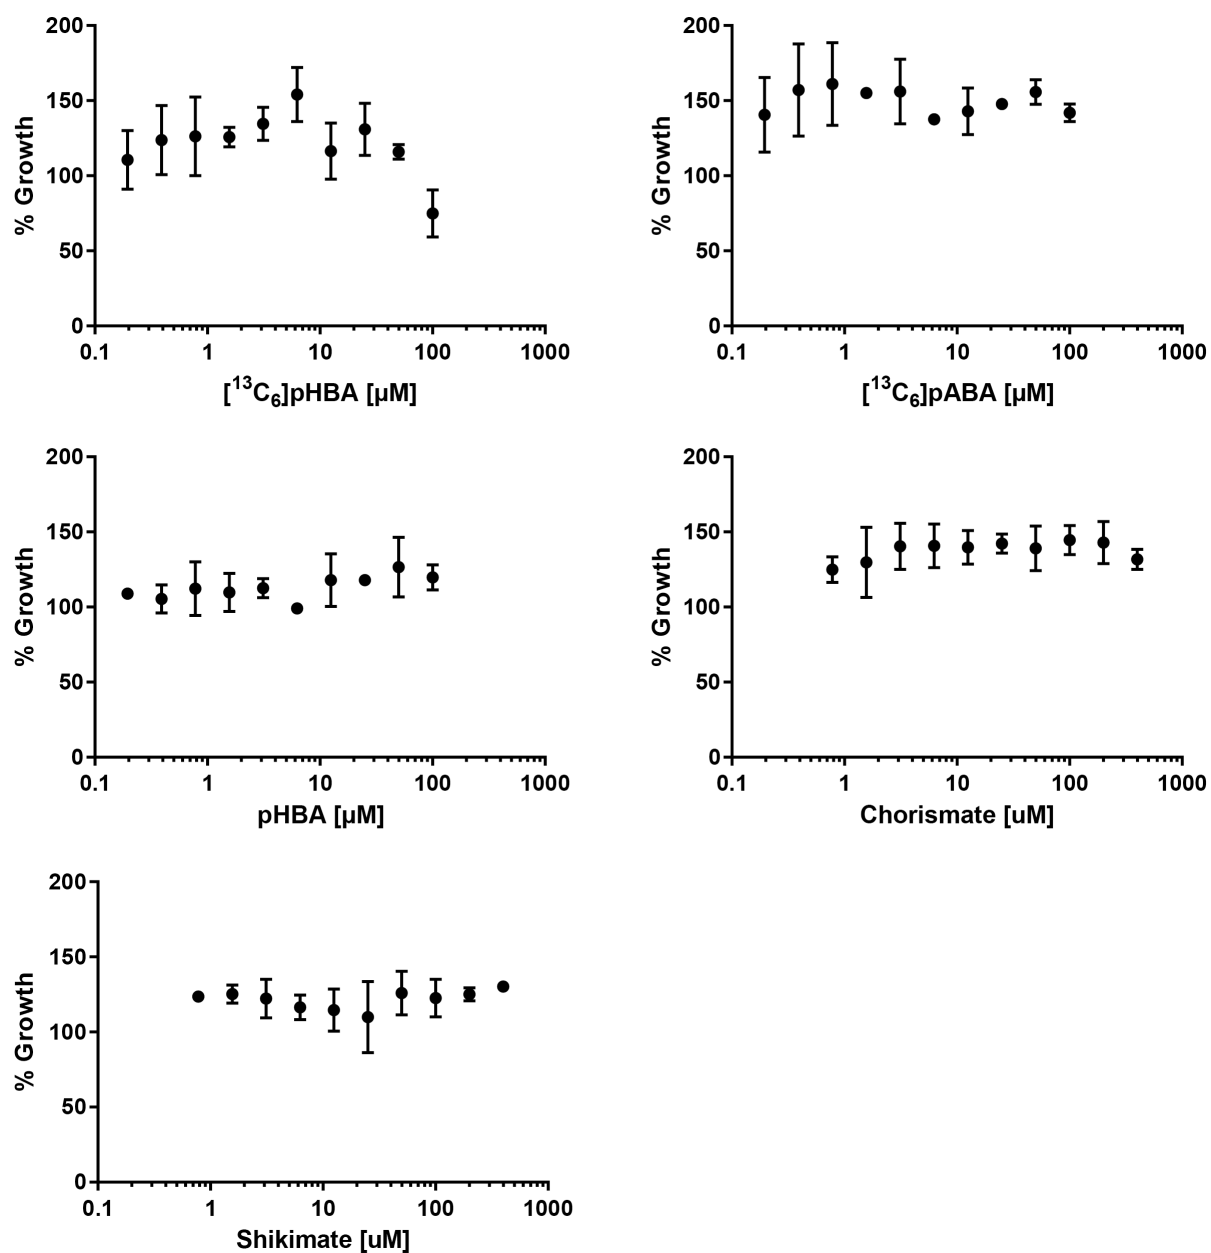

**Fig. S2. Effect of metabolites on *P. falciparum* in vitro growth.** Concentration-dependent potential metabolite toxicity was assessed in MM by SYBR green assay after 72 h incubation.

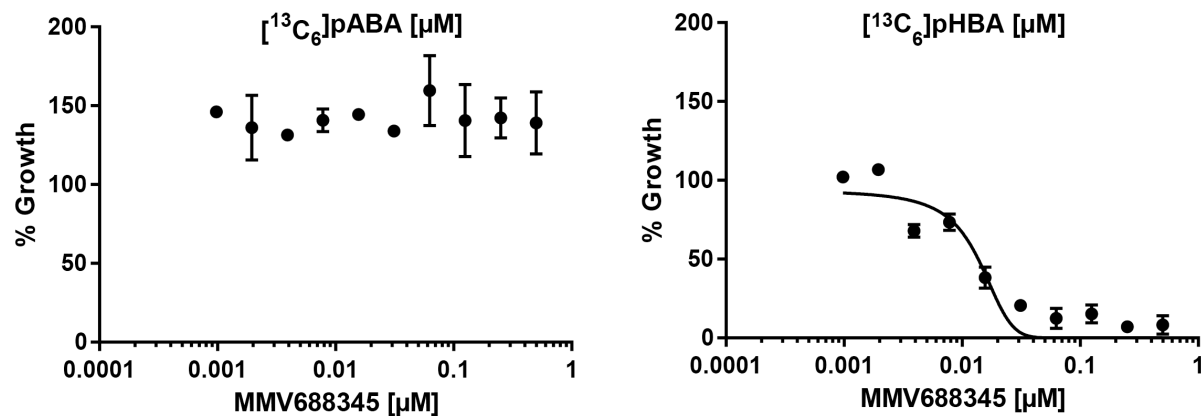

**Fig. S2. (continuation) Reversal of growth inhibition by MMV688345.** *P. falciparum* *in vitro* reversal of growth inhibition by MMV688345 in the presence of 7.3  $\mu\text{M}$   $[^{13}\text{C}_6]\text{pHBA}$  or  $[^{13}\text{C}_6]\text{pABA}$  was assessed in MM by SYBR green assay after 72 h incubation.

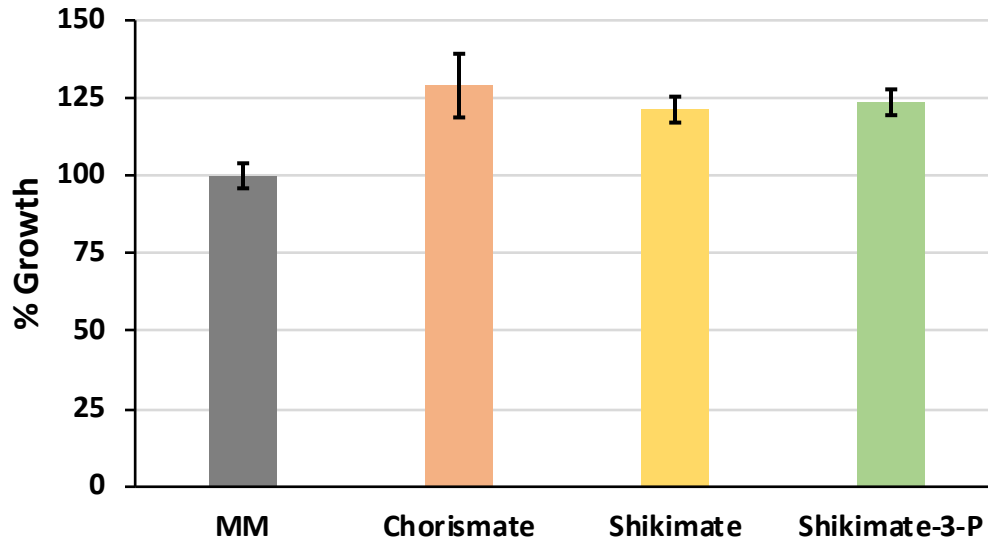

**Fig. S3. *P. falciparum* growth in MM in the presence of different metabolites from the shikimate pathway.** Cultures were supplemented with chorismate (12.5  $\mu$ M), shikimate (25  $\mu$ M) or shikimate-3-phosphate (25  $\mu$ M) and growth was assessed by SYBR green assay. Values represent the mean  $\pm$  S.E.M. from at least three independent assays performed in triplicate. *P* values for each supplemented metabolite with respect to control are: (\*) < 0.00001, (\*\*) < 0.000004 and (\*\*\*) < 0.000009.

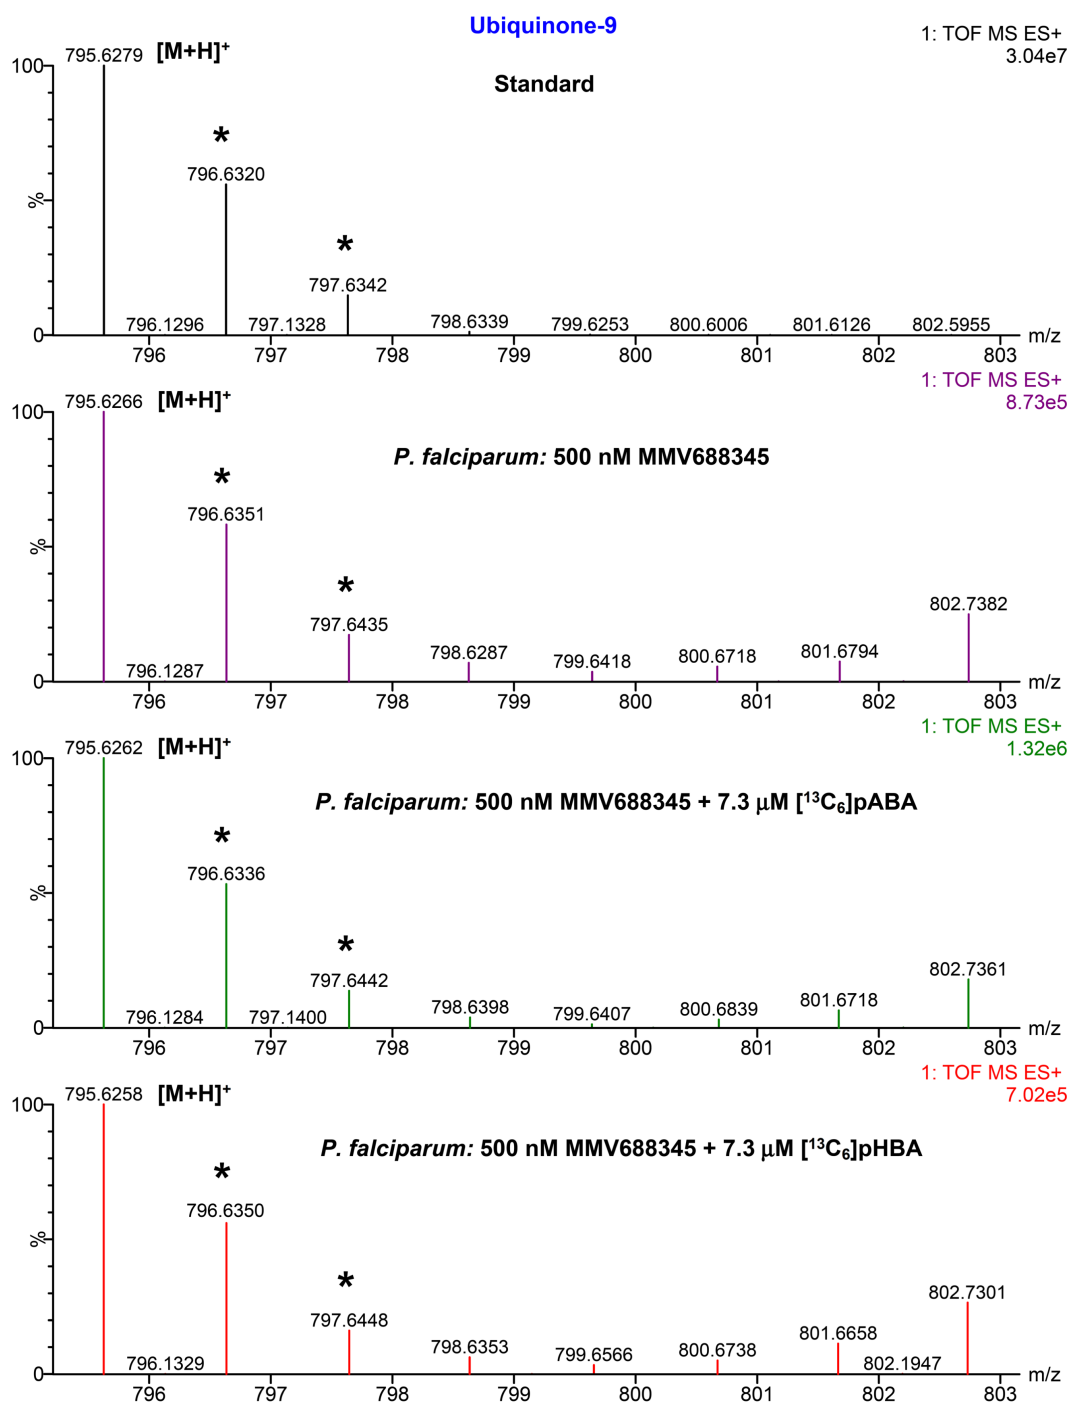

**Fig. S4. LC-HRMS positive-ion mode spectra of ubiquinone-9 to assess whether *P. falciparum* is able to use [<sup>13</sup>C<sub>6</sub>]pHBA and [<sup>13</sup>C<sub>6</sub>]pABA as a metabolic precursor for ubiquinone biosynthesis.** [M+H]<sup>+</sup> indicates the positive-ion corresponding to the mass of ubiquinone-9 and (\*) indicates its natural isotopic distribution. The ion corresponding to the [<sup>13</sup>C<sub>6</sub>]ubiquinone-9 ([M+H]<sup>+</sup> expected = 801.6487) for [<sup>13</sup>C<sub>6</sub>]pHBA or [<sup>13</sup>C<sub>6</sub>]pABA incorporation into the head group of ubiquinone-9 was not detected.

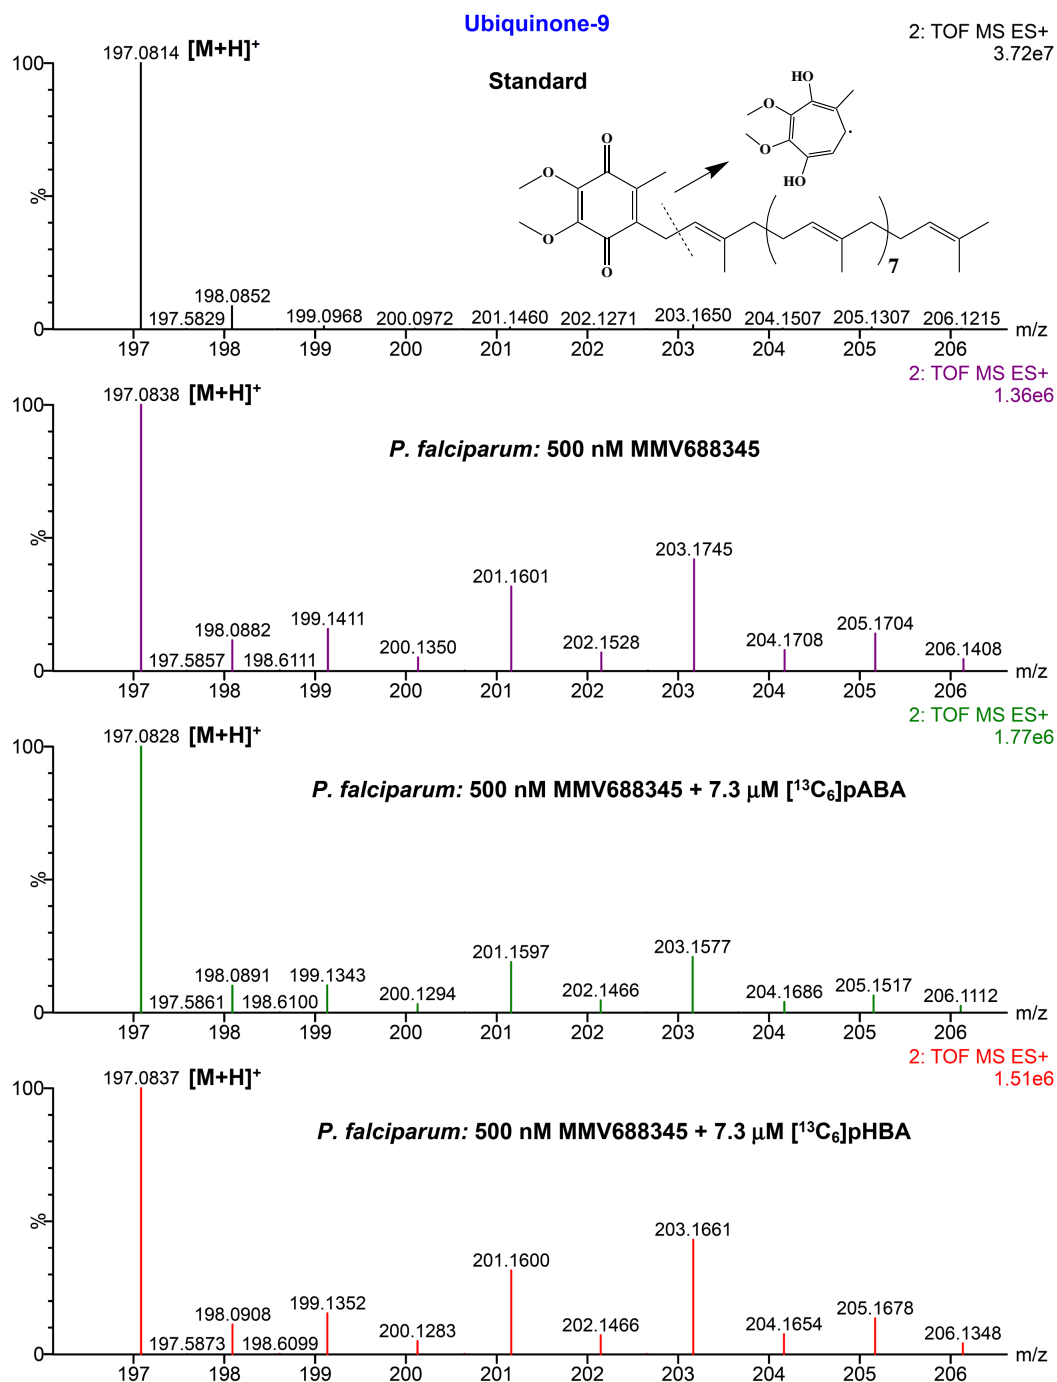

**Fig. S4. (continuation) Mass fragmentation profile of ubiquinone-9.** [M+H]<sup>+</sup> indicates the positive-ion corresponding to the mass of the ubiquinone-9 tropylium ion ([M]<sup>+</sup> expected = 197.0808). The predicted fragmentation is shown. The [<sup>13</sup>C<sub>6</sub>]tropylium ion (<sup>13</sup>C<sub>6</sub>-[M]<sup>+</sup> expected = 203.1010) was not detected.



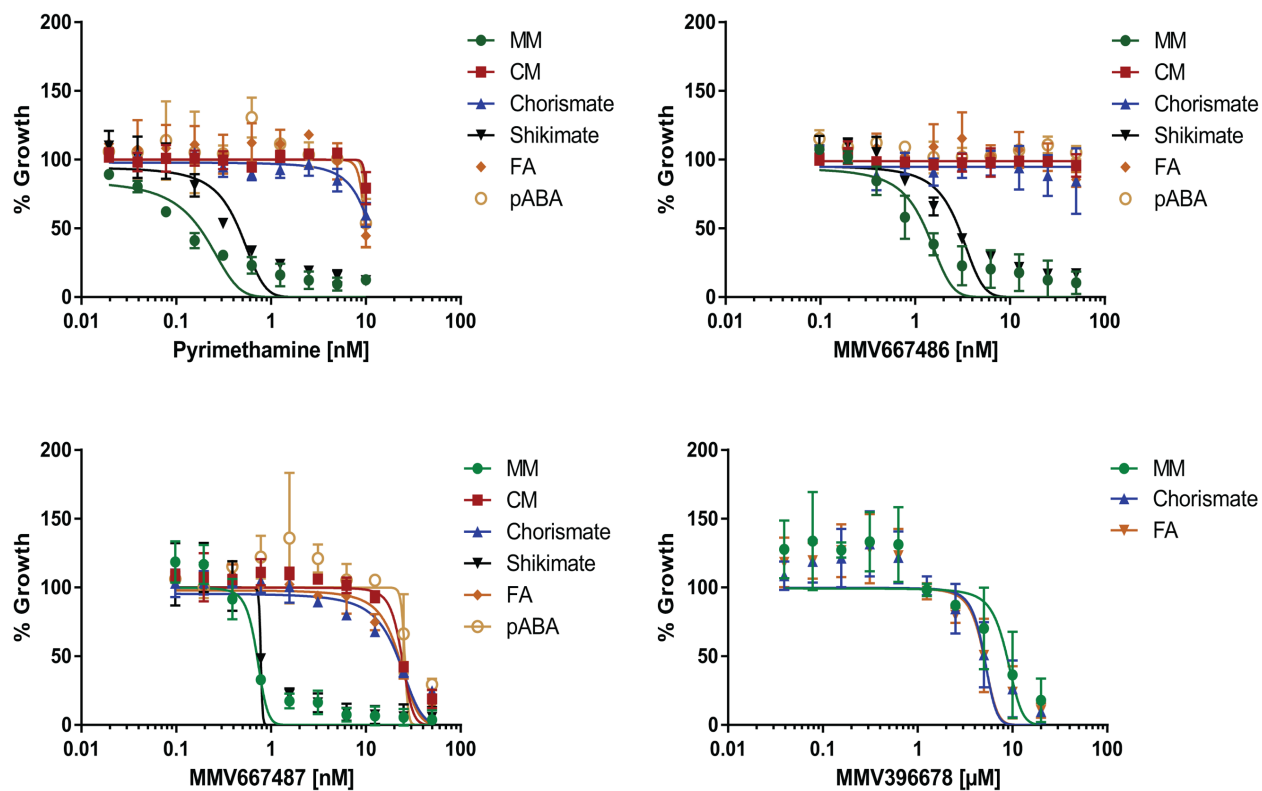

**Fig. S5.** Growth inhibition observed in MM by pyrimethamine ( $IC_{50} = 0.18 \pm 0.03$  nM), MMV667486 ( $IC_{50} = 1.28 \pm 0.17$  nM) and MMV667487 ( $IC_{50} = 0.71 \pm 0.05$  nM) was reversed in CM while growth inhibition by MMV396678 ( $IC_{50} = 8,723 \pm 1.3$  nM) was not reversed by FA. Chorismate, FA and pABA but not shikimate, also reversed growth inhibition by pyrimethamine, MMV667486 and MMV667487 similar to MMV688345. The following metabolite concentrations were used: 25  $\mu$ M of shikimate, 12.5  $\mu$ M of chorismate and 7.3  $\mu$ M of FA.
